# Supplementary material
Source: MDPI journal article supplement (https://www.mdpi.com/2410-3888/7/1/23)
Supplement: s1 [file s1]

**Table S1.** Information of Microsatellite primer in this study.

| Primers | Sequence                                         | Repeat Unit                              | Annealing Temperature (°C) |
|---------|--------------------------------------------------|------------------------------------------|----------------------------|
| Tail A  | GCCTCCCTCGCGCCA                                  |                                          | 63                         |
| DJ234   | F:ATGAATTGGACAGGAAGAGA<br>R:ATGCTATTCCACTGTGAATG | (AG) <sub>16</sub>                       | 55                         |
| DJ516   | F:GCTGTCCACAATAGAATTACC<br>R:CTCTGTCTTTGCTGTCCAT | (GA) <sub>18</sub>                       | 50                         |
| DJ276   | F:CAACATGGAGACAGATAGAGT<br>R:TTGGGCTATGCTGATAAGC | (AG) <sub>6</sub> ... (GA) <sub>25</sub> | 59                         |
| D13     | F:AGTAACCAGCGGCTATGT<br>R:GGTACTACTACTGCCTGAAA   | (AC) <sub>13</sub>                       | 62                         |
| DJ360   | F:TTGGAGACTGCTGTTACAC<br>R:ATCCTCTCACTGCATTCATT  | (GA) <sub>21</sub>                       | 57                         |

**Table S2.** Mitochondrial molecular (D-loop & cyt b) indices.

| Sequence     | Population | N   | S  | K       | Hap | Hd    | $\pi$   | Tajima's D | Fu's      |
|--------------|------------|-----|----|---------|-----|-------|---------|------------|-----------|
| D-loop       | HM         | 27  | 30 | 4.145   | 19  | 0.943 | 0.0038  | -1.78965   | -2.58805  |
|              | HX         | 28  | 6  | 0.429   | 2   | 0.071 | 0.00039 | -2.09646*  | -3.4717** |
|              | QY         | 24  | 16 | 4.547   | 11  | 0.841 | 0.00417 | 0.21814    | -0.35339  |
|              | LX         | 29  | 6  | 1.153   | 3   | 0.532 | 0.00106 | -0.70656   | 0.75111   |
|              | BL         | 24  | 19 | 3.924   | 12  | 0.874 | 0.00327 | -0.08174   | -0.5662   |
|              | HZ         | 23  | 15 | 3.565   | 9   | 0.812 | 0.00361 | -1.1258    | -1.26537  |
|              | Total      | 155 | 40 | 4.25002 | 37  | 0.853 | 0.0039  | -1.25037   | -2.82355* |
| <i>Cyt b</i> | HM         | 23  | 10 | 0.949   | 10  | 0.688 | 0.0009  | -2.1913**  | -3.2657** |
|              | HX         | 28  | 2  | 0.143   | 3   | 0.14  | 0.00014 | -1.5106    | -2.35188  |
|              | QY         | 16  | 3  | 0.592   | 3   | 0.242 | 0.00053 | -1.0018    | -0.33572  |
|              | LX         | 20  | 0  | 0       | 1   | 0     | 0       | 0          | 0         |
|              | BL         | 24  | 7  | 1.15238 | 4   | 0.414 | 0.00104 | -1.32187   | -1.46387  |
|              | HZ         | 21  | 7  | 0.583   | 4   | 0.239 | 0.00053 | -2.15287*  | -3.45939* |
|              | Total      | 132 | 22 | 0.569   | 18  | 0.306 | 0.00051 | -2.4382**  | -4.6887** |

The population genetic statistics includes N: total number of individuals sampled in the population; Hap: number of haplotypes; S: number of segregating sites; K: average number of nucleotide differences; Hd: haplotype diversity;  $\pi$ : nucleotide diversity; Tajima'sD: Tajima's D test value; Fu's: Fu's Fs-test value.

\*\*P < 0.02; \* P < 0.05

**Table S3.** Distribution of haplotypes and polymorphic sites based on D-loop.

| Hap    | Sequence                                                            | Number | Component                         |
|--------|---------------------------------------------------------------------|--------|-----------------------------------|
| Hap_1  | GCATTGGATAGGAGCACTTCCGAGAGAGAAGGCCTTCTC                             | 2      | BL :1<br>HZ:1<br>BL:8             |
| Hap_2  | . . . . . G . . A . . . . . T . . . . . T . . . . .                 | 22     | HM:5<br>HZ:7<br>QY:2<br>BL: 7 HM: |
| Hap_3  | . . . . . G . . A . . . . .                                         | 15     | 1 HX:1<br>HZ:5<br>QY:1            |
| Hap_4  | . . G C . . . . G . . A A . . . . T . . T . . . . . C .             | 1      | BL:1                              |
| Hap_5  | . . . . . G C . . A . . . . . T . . . . . T . . . C .               | 3      | BL:1 HZ:2                         |
| Hap_6  | . . . . . A . G C . . A G . . . . . T . . . . . C .                 | 3      | BL:3                              |
| Hap_7  | . . . . . A . G . . . A . . . . . T . . . . . C .                   | 1      | BL:1                              |
| Hap_8  | A . G . . . . G . . A A . . . . . T . . . . . T C .                 | 1      | BL:1                              |
| Hap_9  | . . G . . A A G . . A A G . . . . . T . . . . . C .                 | 2      | BL:1 HZ:1<br>HM:5<br>HX:27        |
| Hap_10 | . . . . . G C . . . . . T . . . . . T . . . . . T . A . . .         | 50     | HZ:1 LX:9<br>QY:8<br>HM:1<br>HZ:1 |
| Hap_11 | . . . . . G . . A . . . . . T . . . . . A . . T . . . .             | 2      | HM:1<br>HZ:1                      |
| Hap_12 | . . . . . G . . A . . . . . T . . . . . G A . . . . T . . . .       | 1      | HM:1                              |
| Hap_13 | . . . . . G . . A . . . . . T . . . . . G . . . T . . . .           | 1      | HM:1                              |
| Hap_14 | . . . . . A . G C . A A G . . . . C . T T . . . . . G . . G . . C . | 1      | HM:1                              |
| Hap_15 | . . . . . G . . . . . A . . . . . T . . . . . T . . . .             | 1      | HM:1                              |
| Hap_16 | . . . . . G . . A . . . . . T . . . . G . . . . . T . . . .         | 1      | HM:1                              |
| Hap_17 | . . . . . G . . A . . A T . . . . . T C . . . .                     | 1      | HM:1                              |
| Hap_18 | . . . . . G . . A . G . . . . . T . . . .                           | 7      | HM:1<br>QY:6                      |
| Hap_19 | . . . . . A G . . A . . . . . T T . . . . . T . . . .               | 1      | HM:1                              |
| Hap_20 | . . . . . G . . A . . . . . T . . . A . . . . . T . . . .           | 4      | HM:1<br>HZ:1 LX:2                 |
| Hap_21 | . . . . . G . . A . . T . . . . . A . . . . . A . T . . . .         | 1      | HM:1                              |
| Hap_22 | . . . . . G . . A . . . . . T . . . . . T . C . . .                 | 1      | HM:1                              |
| Hap_23 | . T . . . . . G . . A . . . . . T . . . . . G . . T . . . .         | 1      | HM:1                              |
| Hap_24 | . . . . . G . . A . . . . . T . . . . . A                           | 1      | HM:1                              |
| Hap_25 | . . . . C . . G . . A . G . . G . . T . . . . . T . . . .           | 1      | HM:1                              |
| Hap_26 | . . . . . G . . . . . T . . . .                                     | 1      | HM:1                              |
| Hap_27 | . T . . . . . G . . A . . . . . T . . . . . T . . . .               | 1      | HM:1                              |

|        |                                                               |    |              |
|--------|---------------------------------------------------------------|----|--------------|
| Hap_28 | . . . . . G . . A . . . . . T . . . . .                       | 2  | HZ:1<br>QY:1 |
| Hap_29 | . . . . . C . . G . . A . . . . . T . . . . . T . . . . .     | 1  | HZ:1         |
| Hap_30 | . . G . . A A G C . A A G . . . . . T T . G . . . . . C .     | 1  | HZ:1         |
| Hap_31 | . . . . . G C . . . . . T . A . . . T . . . . . T . A . . .   | 18 | LX:18        |
| Hap_32 | . . . . . G C . . A . . . . . T . . . . . C .                 | 1  | QY:1         |
| Hap_33 | . . . . C . . G . . A . G . . G . . C T . . . . . T . . . . . | 1  | QY:1         |
| Hap_34 | . . . . . A . G . . A A G . . . . . T . . . . . C .           | 1  | QY:1         |
| Hap_35 | . . . . . G . G A . . . . . T . . . . . T . . . . .           | 1  | QY:1         |
| Hap_36 | . . . . . A . G . . A G . . . . . T T . . . . . C .           | 1  | QY:1         |
| Hap_37 | . . G . . A . G . . A A G . . . . . T . . . . . C .           | 1  | QY:1         |

---

**Table S4.** Distribution of haplotypes and polymorphic sites based on Cyt b.

| Hap    | Sequence                                    | Number | Component |
|--------|---------------------------------------------|--------|-----------|
|        |                                             |        | BL :16    |
|        |                                             |        | HM:13     |
| Hap_1  | T G A T C G C A C G G G A T T A C G T A G G | 110    | HX:26     |
|        |                                             |        | HZ:21     |
|        |                                             |        | LX:20     |
|        |                                             |        | QY:14     |
| Hap_2  | . . . . . T . . . . .                       | 1      | BL:1      |
| Hap_3  | . . . . . T . . . . . G . . C . . .         | 3      | BL:3      |
|        |                                             |        | BL:1 HZ:1 |
| Hap_4  | . . . . . A . G A .                         | 3      | QY:1      |
| Hap_5  | . . . . . A . . . . .                       | 2      | HM:1      |
| Hap_6  | . . . . . G . . . . .                       | 1      | HM:2      |
| Hap_7  | . . . . . A . . . . .                       | 1      | HM:1      |
| Hap_8  | . . . . . A . C . . . . .                   | 1      | HM:1      |
| Hap_9  | . . G . . . . .                             | 1      | HM:1      |
| Hap_10 | . . . . . T . . . . .                       | 1      | HM:1      |
| Hap_11 | . . . . . A . . . . .                       | 1      | HM:1      |
| Hap_12 | . . . . . T . . . . .                       | 1      | HM:1      |
| Hap_13 | . . . . . C . . . . .                       | 1      | HM:1      |
| Hap_14 | A . . . . .                                 | 1      | HX:1      |
| Hap_15 | . . . . . A                                 | 1      | HX:1      |
| Hap_16 | . A . . . . .                               | 1      | HZ:1      |
| Hap_17 | . . . C . . . G T . . . . .                 | 1      | HZ:1      |
| Hap_18 | . . . . . A . G . .                         | 1      | QY:1      |

**Table S5.** Pairwise  $F_{ST}$  (lower diagonal) and P-values (upper diagonal) between populations based on 5 microsatellite loci.

|    | HM       | HX       | LX      | QY       | HZ    | BL    |
|----|----------|----------|---------|----------|-------|-------|
| HM |          | 0.000    | 0.207   | 0.036    | 0.009 | 0.279 |
| HX | 0.072 ** |          | 0.000   | 0.000    | 0.000 | 0.000 |
| LX | 0.005    | 0.036 ** |         | 0.027    | 0.000 | 0.144 |
| QY | 0.011 *  | 0.039 ** | 0.019*  |          | 0.000 | 0.009 |
| HZ | 0.021*   | 0.058 ** | 0.031** | 0.023 ** |       | 0.144 |
| BL | 0.004    | 0.048**  | 0.006   | 0.017**  | 0.007 |       |

\*P<0.05, \*\* P<0.001
